# Supplementary material for: Saccharomyces cerevisiae Rhodanese RDL2 Uses the Arg Residue of the Active-Site Loop for Thiosulfate Decomposition
Source: MDPI journal article supplement (doi:10.3390/antiox10101525), 2021-09-26
Supplement: s1 [file s1]

***Saccharomyces cerevisiae* rhodanese RDL2 uses the Arg residue of the active-site loop for thiosulfate decomposition**

Qingda Wang<sup>1</sup>, Huanjie Li<sup>2</sup>, Yongzhen Xia<sup>1</sup>, Luying Xun<sup>1,3</sup>, Huaiwei Liu<sup>1\*</sup>

<sup>1</sup>State Key Laboratory of Microbial Technology, Shandong University, Qingdao, 266237, PR China;

<sup>2</sup>School of Medicine, Cheeloo College of Medicine, Shandong University, Jinan, 260024, China

<sup>3</sup>Department of Chemistry, School of Molecular Biosciences, Washington State University, Pullman, WA, 99164-4630, USA.

Running title: *The loop-ending amino acids are critical for rhodanese activities*

\*Co-correspondence: liuhuawei@sdu.edu.cn; Tel. + 81 532 58631572.



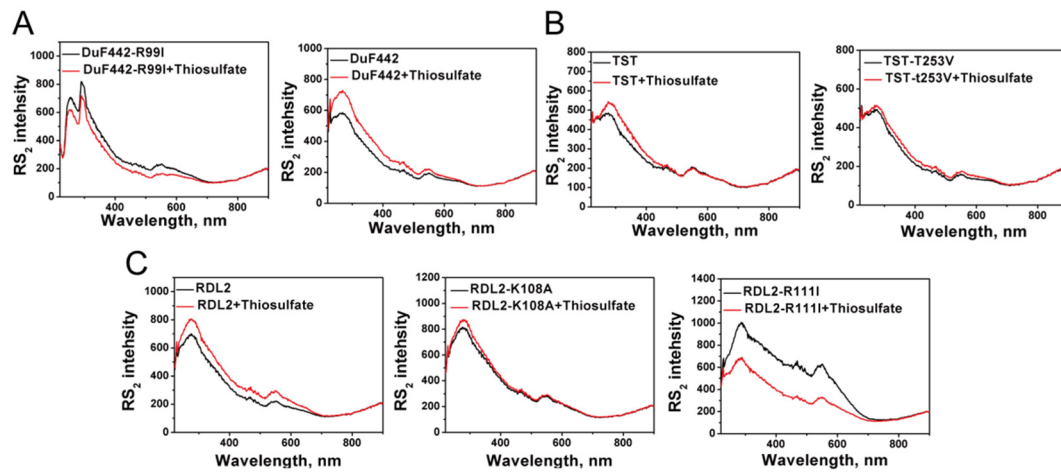

**Figure S2.  $RS_2$  analysis of unreacted- and thiosulfate-reacted rhodanese.**  $\Delta RS_2$  at a specific wavelength was calculated by  $\Delta RS_2^w_{\text{reacted}} - \Delta RS_2^w_{\text{unreacted}}$  ( $w$  is the wavelength). Total  $\Delta RS_2$  was calculated by adding up all  $\Delta RS_2$  values at 240 nm~550 nm range.

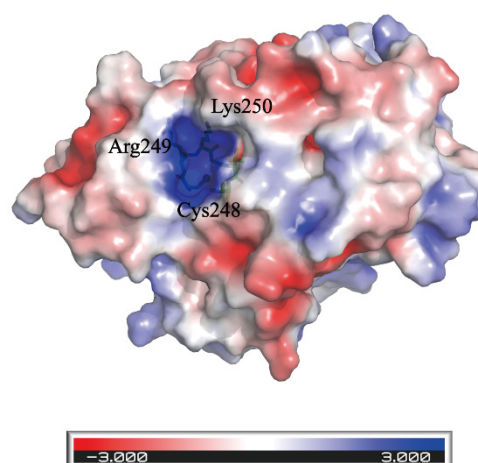

**Figure S3. Modeled 3D structure of TST.** The structure of DUF442 was generated by SWISS-MODEL using the *Bos taurus* rhodanese as a template (PDB entry: 1DP2) (90.7% sequence similarity). The 3D homology modeling structure of TST showed that its active

center is located in a pocket with positive electrostatic field. Lys<sub>250</sub> and Arg<sub>249</sub> on the active site loop are major contributors to the positive electrostatic field.

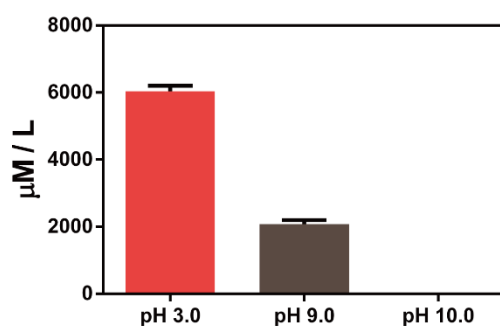

**Figure S4.** HPLC quantification of S<sub>8</sub> produced from decomposition of thiosulfate. Thiosulfate produces more S<sub>8</sub> at pH 3.0 and does not decompose at pH 10.0.
